# Supplementary material
Source: publisher site journal article supplement (https://www.dovepress.com/article/452884)
Supplement: Supplementary file 1 [file get_supplementary_file.php]

**Supplemental Table 1: Sensitivity Analysis - Univariate Analysis Identifying Potential Predictors of Vision Loss**

|  |  | **Mild-Mod Vision Loss (n = 56)** | **Severe Vision Loss**  **(n = 23)** | **Total**  **(n = 79)** | **P value** |
| --- | --- | --- | --- | --- | --- |
| **Demographic** | |  |  |  |  |
| Age at diagnosis, mean (SD), years | | 62 (11.6) | 72 (14.1) | 65 (13.0) | 0.003* |
| Sex: females, No. (%) |  | 17 (30.3) | 16 (69.6) | 33 (41.8) | 0.002* |
| Race, No. (%) | White | 30 (53.6) | 11 (47.8) | 41 (52.0) | 0.851 |
|  | Black | 14 (25.0) | 8 (34.8) | 22 (27.8) |  |
|  | Hispanic | 6 (10.7) | 2 (8.7) | 8 (10.1) |  |
|  | Other | 6 (10.7) | 2 (8.7) | 8 (10.1) |  |
| **Clinical History** |  |  |  |  |  |
| Risk Factors, No. (%) | T2DM | 42 (75.0) | 13 (56.5) | 55 (69.6) | 0.116 |
|  | HTN | 37 (66.1) | 14 (60.9) | 51 (64.6) | 0.796 |
|  | HLD | 22 (39.3) | 5 (21.7) | 27 (34.2) | 0.193 |
| Prior Dx of Glaucoma, No. (%) | | 11 (19.6) | 7 (30.4) | 18 (22.7) | 0.271 |
| Number of Glaucoma Medications, mean (SD) | | 2 (1.5) | 2 (1.5) | 2 (1.5) | 0.981 |
| **Socioeconomic** |  |  |  |  |  |
| Insurance, No. (%) | None | 6 (10.7) | 8 (34.8) | 14 (17.7) | 0.022* |
|  | Private | 13 (23.2) | 2 (8.7) | 15 (19.0) |  |
|  | Medicare | 33 (59.0) | 13 (56.5) | 46 (58.2) |  |
|  | Medicaid | 4 (7.1) | 0 (0.0) | 4 (5.1) |  |
| Area Deprivation Index, mean (SD) | | 50 (24.0) | 55 (20.0) | 51 (22.9) | 0.420 |
| Mean Household Income, mean (SD), thousands | | 69 (23.3) | 61 (17.0) | 67 (21.9) | 0.092 |
| Distance from UVA, mean (SD), miles | | 47 (29.6) | 43 (26.9) | 46 (28.7) | 0.554 |
| Missed follow-up appointments, mean (SD) | | 2 (2.0) | 3 (2.2) | 2 (2.1) | 0.313 |
| **Intervention** | |  |  |  |  |
| Treatment: Anti-VEGF Injections, No. (%) | | 30 (53.6) | 16 (69.6) | 46 (58.2) | 0.314 |
| Treatment: Surgical, | None | 16 (28.6) | 9 (39.1) | 25 (31.6) | 0.575 |
| No. (%) | AGV | 33 (58.9) | 12 (52.2) | 45 (57.0) |  |
|  | Baerveldt | 4 (7.1) | 2 (8.7) | 6 (7.6) |  |
|  | Trabeculectomy | 3 (5.4) | 0 (0.0) | 3 (3.8) |  |
| Treatment: Procedural. | None | 26 (46.4) | 13 (56.5) | 39 (49.4) | 0.378 |
| No. (%) | PRP | 24 (42.9) | 9 (39.1) | 33 (41.8) |  |
|  | Anterior Chamber Tap | 2 (3.6) | 1 (4.3) | 3 (3.8) |  |
|  | Cyclophotocoag-ulation | 4 (7.1) | 0 (0.0) | 4 (5.0) |  |

*statistically significant P<0.05
